# Supplementary material for: MCUb is an inducible regulator of calcium-dependent mitochondrial metabolism and substrate utilization in muscle
Source: PubMed Central journal article supplement — Cell Rep. Author manuscript; Available in PMC 2024 Feb 5. (PMC10842842; doi:10.1016/j.celrep.2023.113465), 2023-11-16
Supplement: NIHMS1948220-supplement-1.pdf [file NIHMS1948220-supplement-1.pdf]

**Cell Reports, Volume 42**

**Supplemental information**

**MCUb is an inducible regulator  
of calcium-dependent mitochondrial metabolism  
and substrate utilization in muscle**

**Jiuzhou Huo, Vikram Prasad, Kelly M. Grimes, Davy Vanhoutte, N. Scott Blair, Suh-Chin Lin, Michael J. Broun, Donald M. Bers, and Jeffery D. Molkentin**

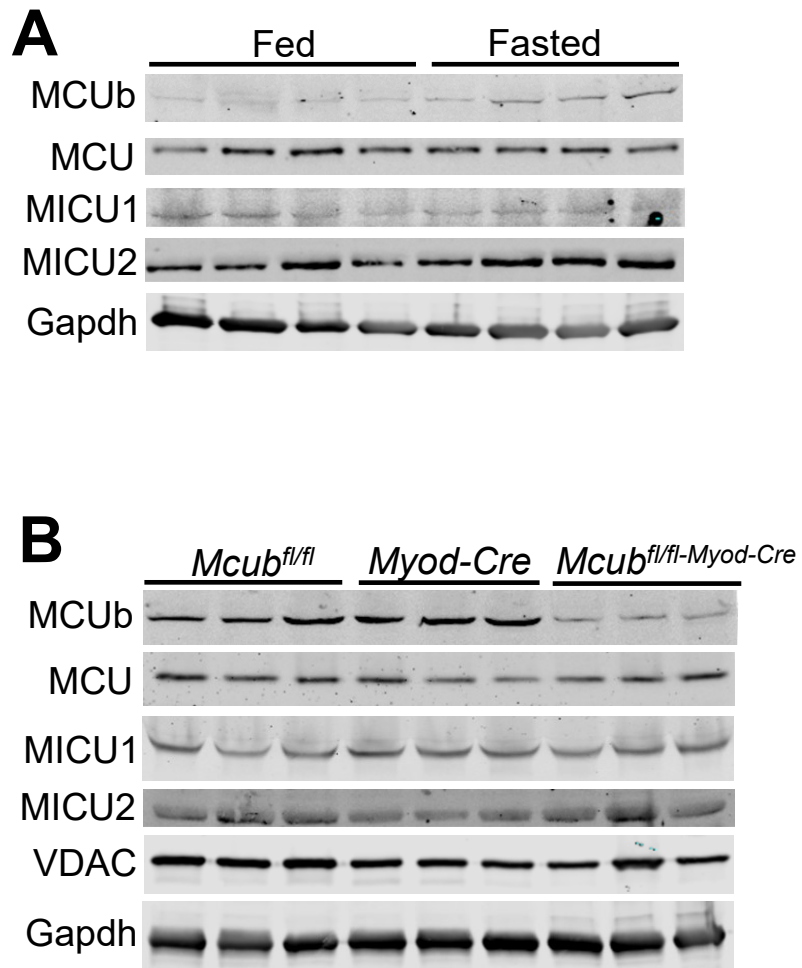

**Figure S1. Protein expression for MCU complex protein in fed and fasted states or without *Mcub* in skeletal muscle.** (A) Western blotting of the indicated proteins from quadriceps of adult mice under fed or 48 h fasted conditions. Gapdh was used as a control. Four mice in each group were analyzed. (B) Western blot for the indicated proteins from quadriceps protein extract in the indicated 2 control groups of mice and mice lacking *Mcub* in skeletal muscle. Gapdh and voltage-dependent anion channel (VDAC) were used as controls. Three mice were analyzed in each group.

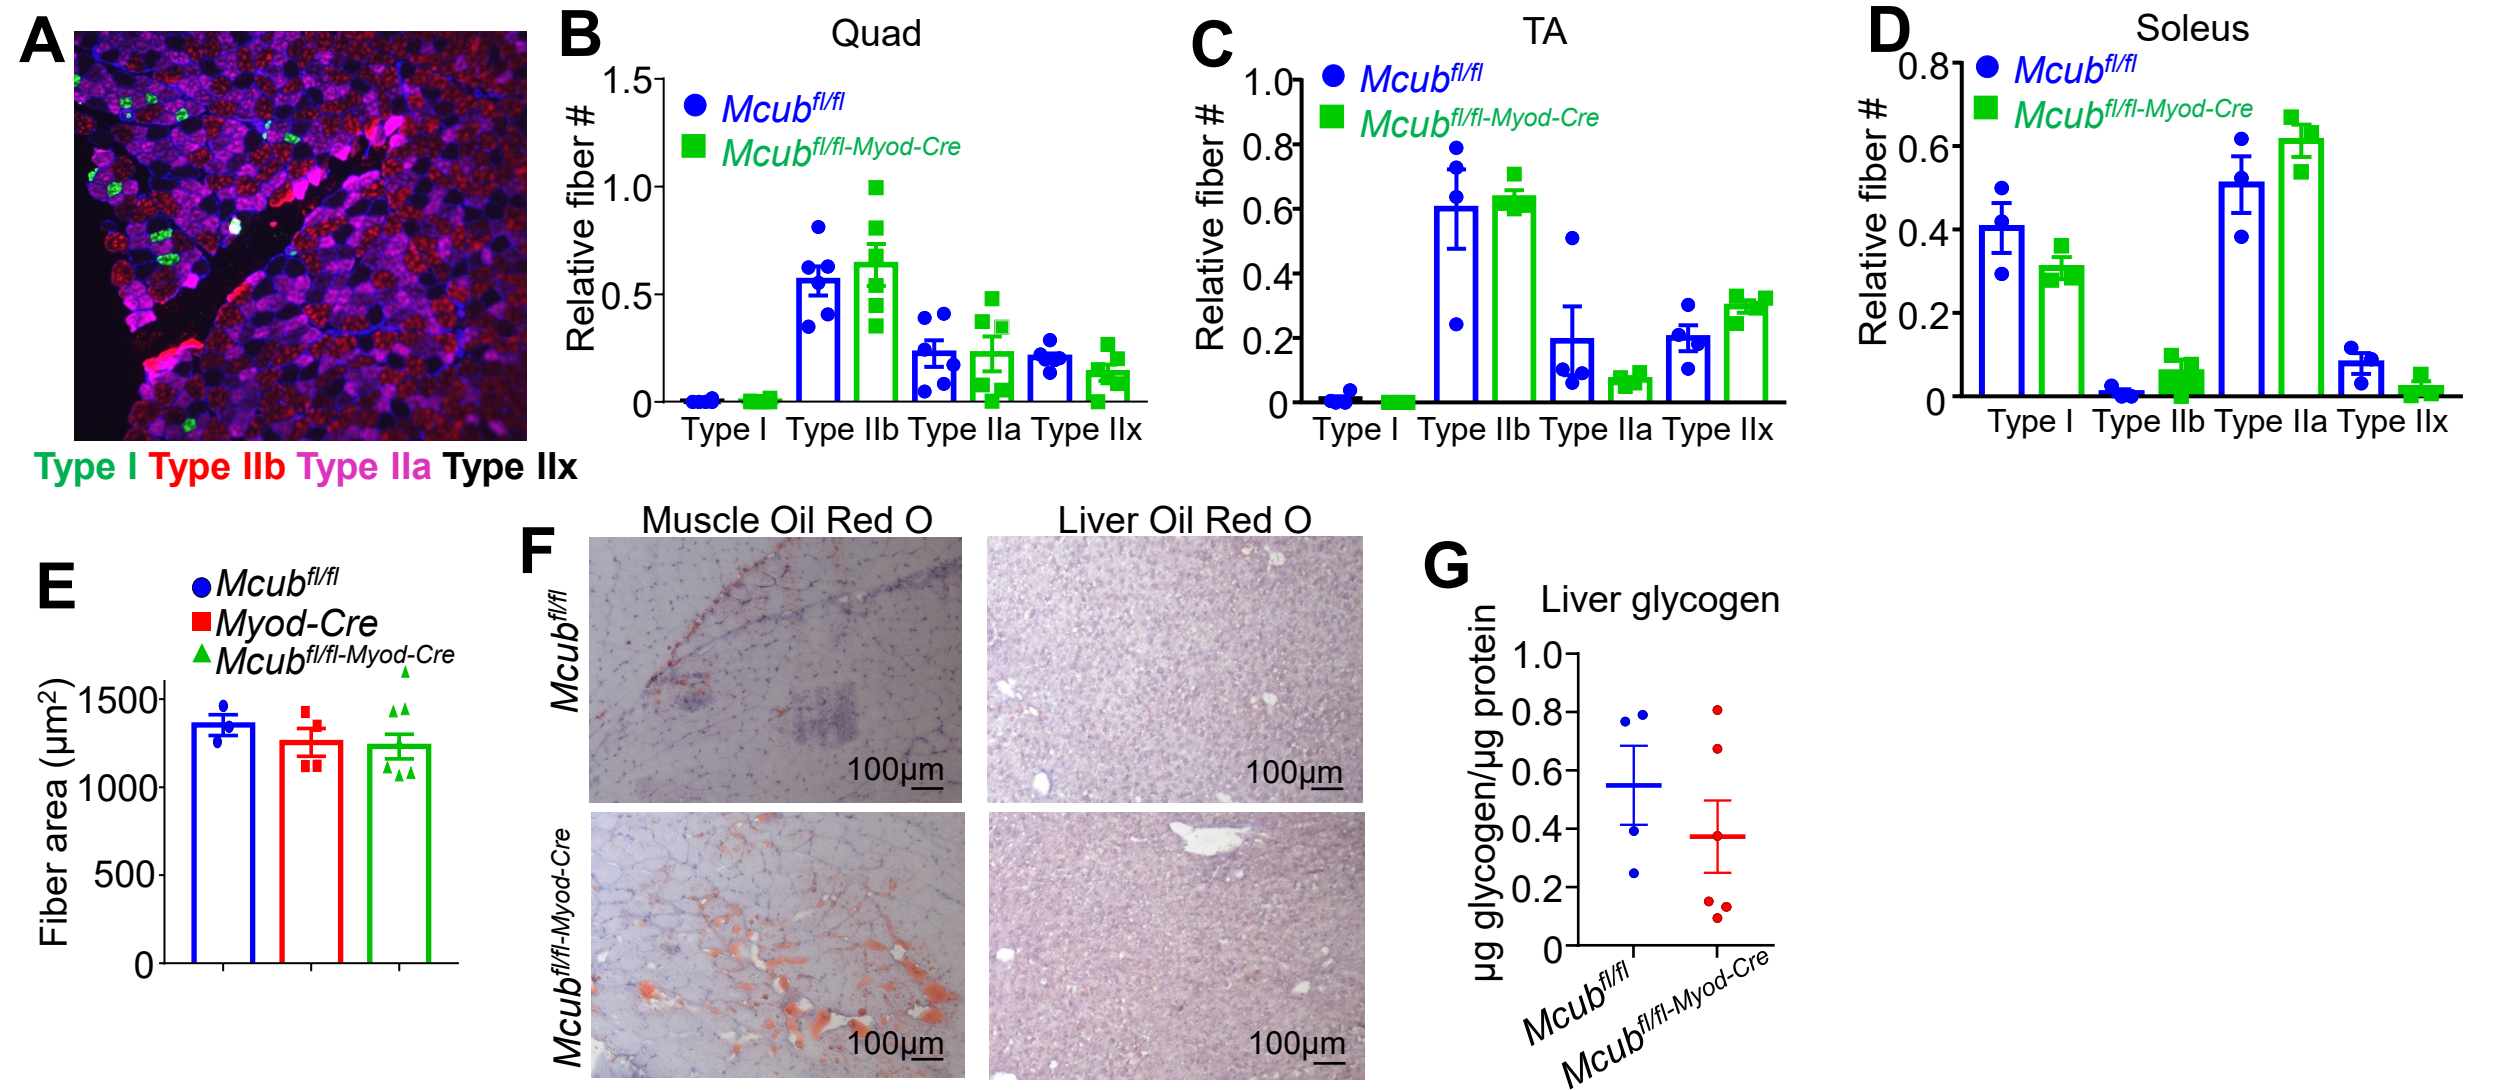

**Figure S2. Analysis of muscle fiber type distribution, muscle and liver lipid accumulation and liver glycogen with *Mcub* gene deletion in skeletal muscle.** (A) Representative immunohistochemistry of fiber type staining as indicated from quadriceps. (B-D) Quantification of fiber type distribution from the indicated groups of mice among different muscle types shown. Data presented as mean  $\pm$  SEM. (E) Quantification of fiber area from quadriceps muscle from the indicated groups of the mice.  $n=3$  in *Mcub<sup>fl/fl</sup>* group,  $n=4$  in *Myod-Cre* group,  $n=6$  in *Mcub<sup>fl/fl</sup>-Myod-Cre* group. (F) Representative Oil Red O-stained histological muscle and liver sections at 100 X magnification from the 2 genotypes of mice shown at 6 months of age. Scale bars are shown in each panel. (G) Liver glycogen measured from the 2 genotypes of mice shown at 6 months of age. Data presented as mean  $\pm$  SEM. No difference was observed in liver glycogen or liver Oil Red O staining, but skeletal muscle Oil Red O staining was prominent in *Mcub<sup>fl/fl</sup>-Myod-Cre* mice but not in the control *Mcub<sup>fl/fl</sup>* mice. Data presented as mean  $\pm$  SEM. Quad, quadriceps, TA, tibialis anterior.

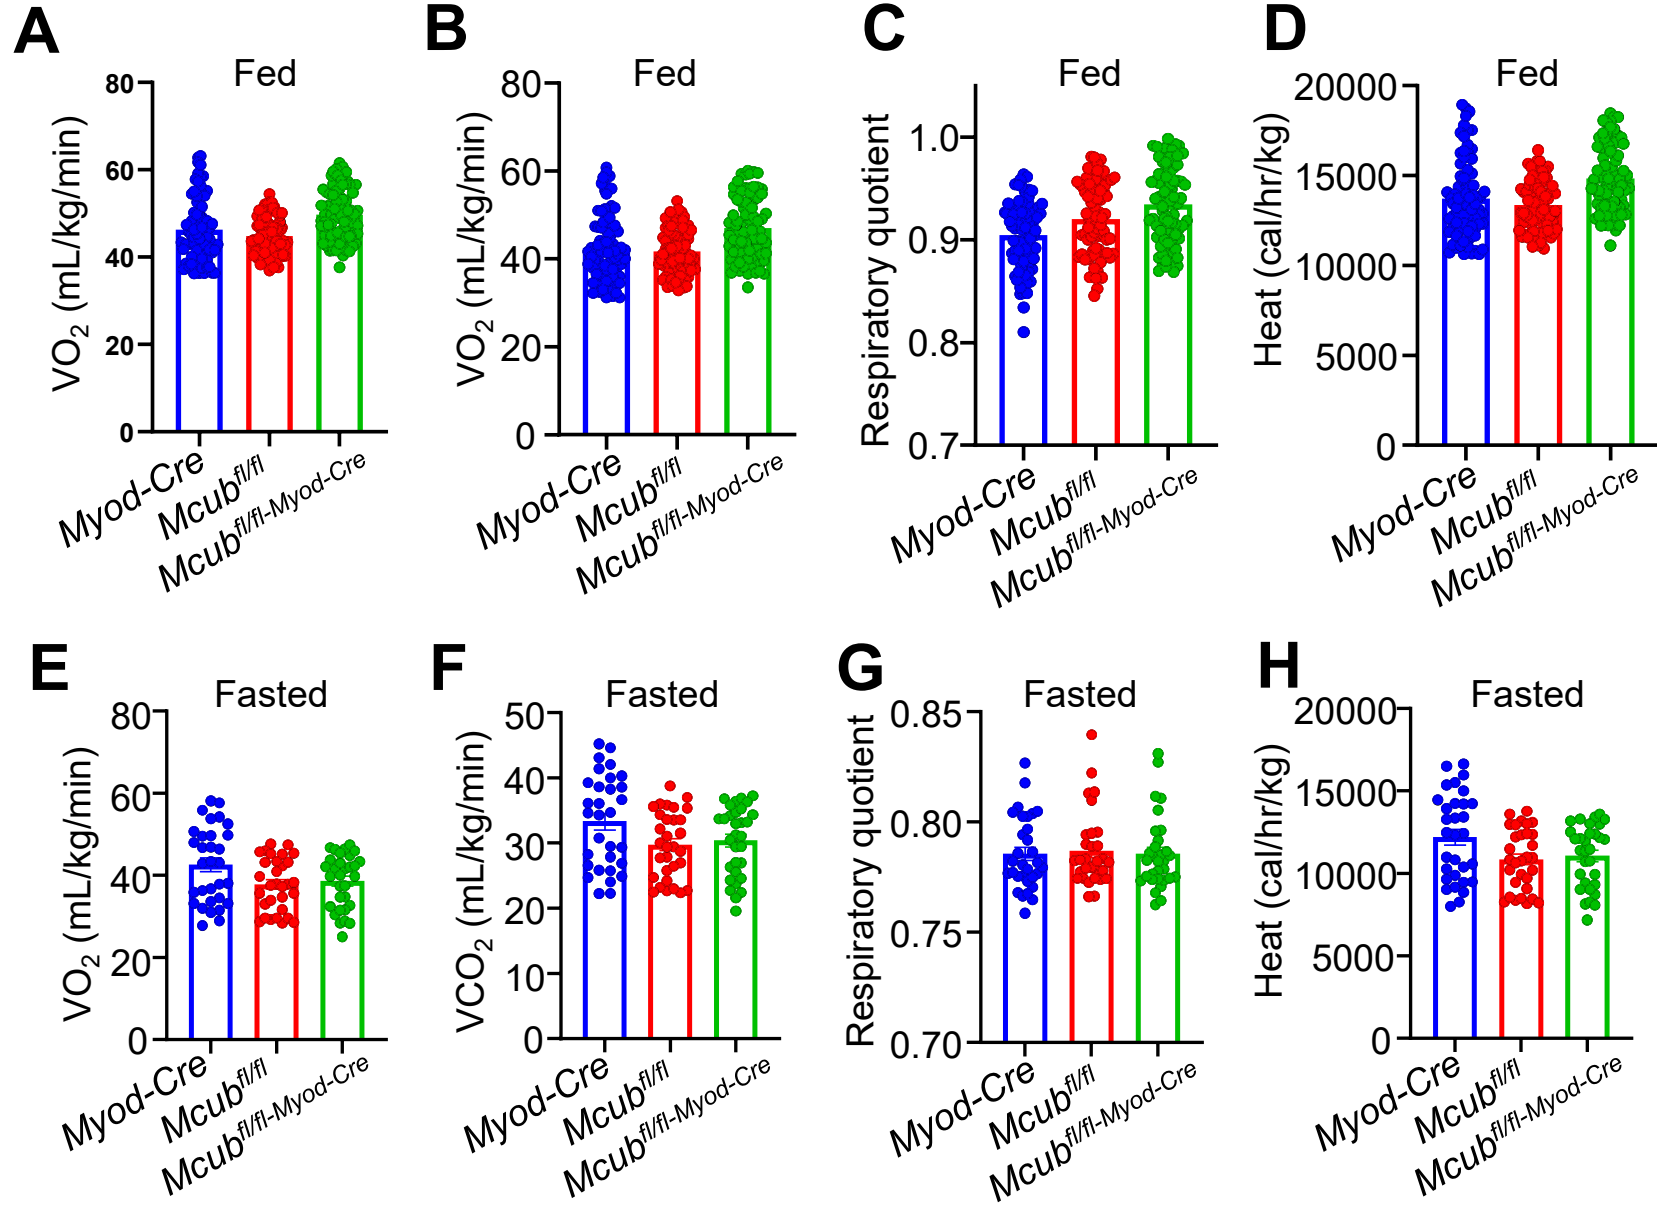

**Figure S3. No changes were observed in indirect calorimetry measurement with *Mcub* muscle-specific deletion.** (A-D) Mice of the indicated genotypes with full access to food for 48 hrs and assessed by indirect calorimetry with the indicated experimental assays. (E-H) Same genotypes of mice and the same indirect calorimetry assessments but with 48 hrs of food restriction (fasted). Data presented as mean  $\pm$  SEM. The results show no significant differences between the 3 groups in either fed or fasted states.

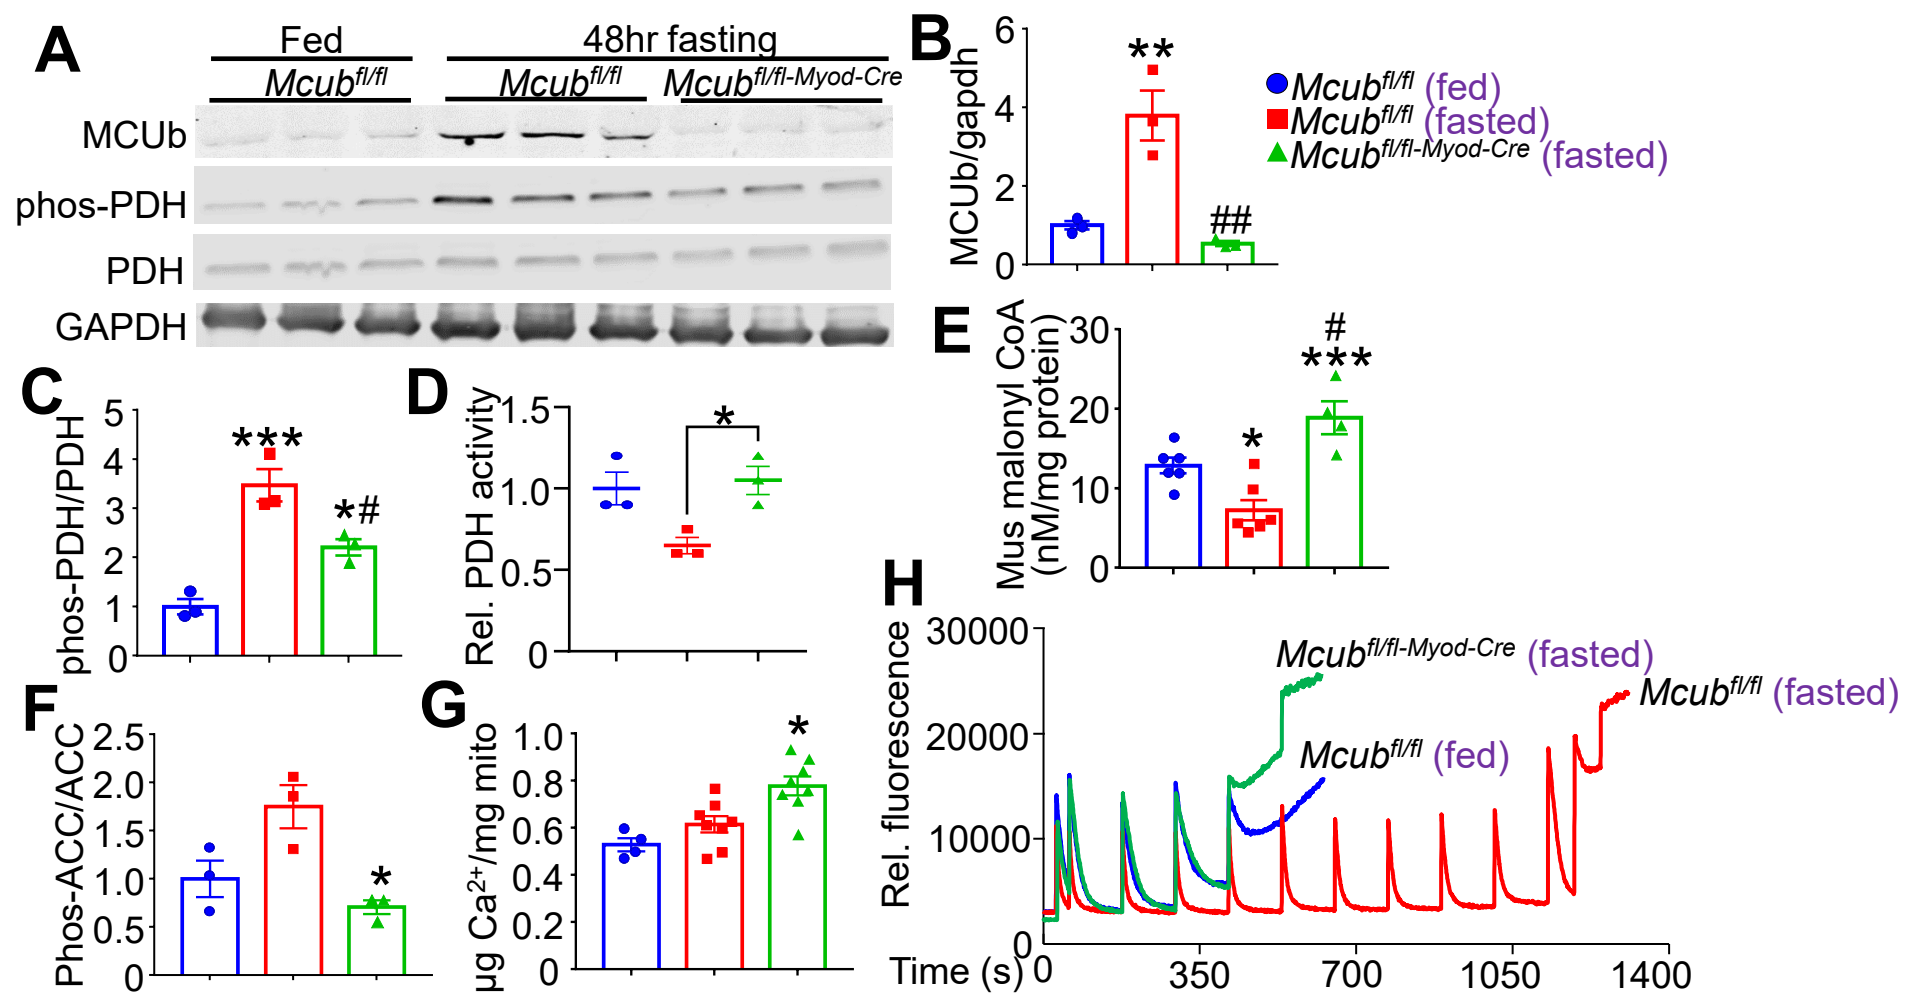

**Figure S4. MCub induction with fasting enhances fatty acid oxidation and mitochondrial Ca<sup>2+</sup> uptake capacity.** (A) Western blots of the indicated proteins from quadriceps in the indicated groups of mice. GAPDH was used as a control. (B) Quantification of Gapdh normalized MCUB expression as shown in A. Data presented as mean ± SEM. One-way ANOVA and post-hoc Bonferroni test was used for statistical analysis. \*\*p<0.01 versus *Mcub<sup>fl/fl</sup>* fed; ###p<0.01 versus *Mcub<sup>fl/fl</sup>* fasted. (C) Quantification of phosphorylated-PDH/PDH ratio in muscle from the groups of mice as shown in A. Data presented as mean ± SEM. One-way ANOVA and Bonferroni's multiple comparison test was used for statistical analysis. \*p<0.05 versus *Mcub<sup>fl/fl</sup>* fed, \*\*\*p<0.001 versus *Mcub<sup>fl/fl</sup>* fed; #p<0.05 versus *Mcub<sup>fl/fl</sup>* fasted. (D) Relative PDH enzymatic activity from quadriceps muscle from the indicated genotypes of mice at 6 months of age. N=3 per group. Data presented as mean ± SEM. One-way ANOVA and Bonferroni's multiple comparison test was used for statistical analysis. \*p<0.05 (E) Quadriceps malonyl CoA levels from the indicated groups of mice at 6 months of age. N=6 in *Mcub<sup>fl/fl</sup>* control fed group, n=6 in *Mcub<sup>fl/fl</sup>* fasting group, n=4 in *Mcub<sup>fl/fl</sup>-Myod-Cre* fasting group. Data presented as mean ± SEM. One-way ANOVA and Bonferroni's multiple comparison test was used for statistical analysis. \*p<0.05 versus *Mcub<sup>fl/fl</sup>* fed, \*\*\*p<0.001 versus *Mcub<sup>fl/fl</sup>* fed; #p<0.05 versus *Mcub<sup>fl/fl</sup>* fasted (F) Quantification of phosphorylation-ACC/ACC ratio in quadriceps at 6 months of age from the indicated groups of mice. N=3 per group. Data presented as mean ± SEM. One-way ANOVA and Bonferroni's multiple comparison test was used for statistical analysis. \*p<0.05 versus either control groups. (G) Quantification of mitochondrial Ca<sup>2+</sup> levels in isolated quadriceps mitochondria from the indicated groups of mice at 6 months of age. N=4 in *Mcub<sup>fl/fl</sup>* fed control group, n=8 in *Mcub<sup>fl/fl</sup>* fasting group, n=8 in *Mcub<sup>fl/fl</sup>-Myod-Cre* fasting group. Data presented as mean ± SEM. One-way ANOVA and Bonferroni's multiple comparison test was used for statistical analysis. \*p<0.05 versus either control groups. (H) Mitochondrial Ca<sup>2+</sup> retention capacity assay in isolated quadriceps mitochondria from the indicated groups at 6 months of age. Calcium Green-5N was used as the Ca<sup>2+</sup> indicator in solution. Ca<sup>2+</sup> was added at each inflection pulse point until mitochondrial pore transition at end of each tracing.
